# Supplementary material for: Generative molecular design in low data regimes
Source: Springer Nature journal article supplement (doi:10.1038/s42256-020-0160-y), 2020-03-16
Supplement: 42256_2020_160_MOESM1_ESM.pdf [file 42256_2020_160_MOESM1_ESM.pdf]

In the format provided by the authors and unedited.

# Generative molecular design in low data regimes

Michael Moret <sup>1</sup>, Lukas Friedrich<sup>1</sup>, Francesca Grisoni <sup>1</sup>, Daniel Merk<sup>1,2</sup> and Gisbert Schneider <sup>1</sup> 

---

<sup>1</sup>Department of Chemistry and Applied Biosciences, RETHINK, ETH Zurich, Zurich, Switzerland. <sup>2</sup>Goethe University Frankfurt, Institute of Pharmaceutical Chemistry, Frankfurt, Germany. <sup>✉</sup>e-mail: [gisbert@ethz.ch](mailto:gisbert@ethz.ch)

## Supplementary Table

**Supplementary Table 1.** Comparison of the number of novel molecules generated during transfer learning when keeping the first layer of the chemical language model constant (i.e. frozen layer) or without keeping them constant (i.e. fine-tuning all weights). 10,000 molecules were sampled at each epoch.

| Source                                                  | Novel molecules with first layer frozen | Novel molecules without first layer frozen |
|---------------------------------------------------------|-----------------------------------------|--------------------------------------------|
| <b>Transfer learning with five similar compounds</b>    |                                         |                                            |
| Epoch 1                                                 | 9035                                    | 9337                                       |
| Epoch 20                                                | 6543                                    | 461                                        |
| Epoch 40                                                | 3373                                    | 181                                        |
| <b>Transfer learning with five dissimilar compounds</b> |                                         |                                            |
| Epoch 1                                                 | 9459                                    | 9391                                       |
| Epoch 20                                                | 8702                                    | 6244                                       |
| Epoch 40                                                | 8184                                    | 4383                                       |

## Supplementary Figures

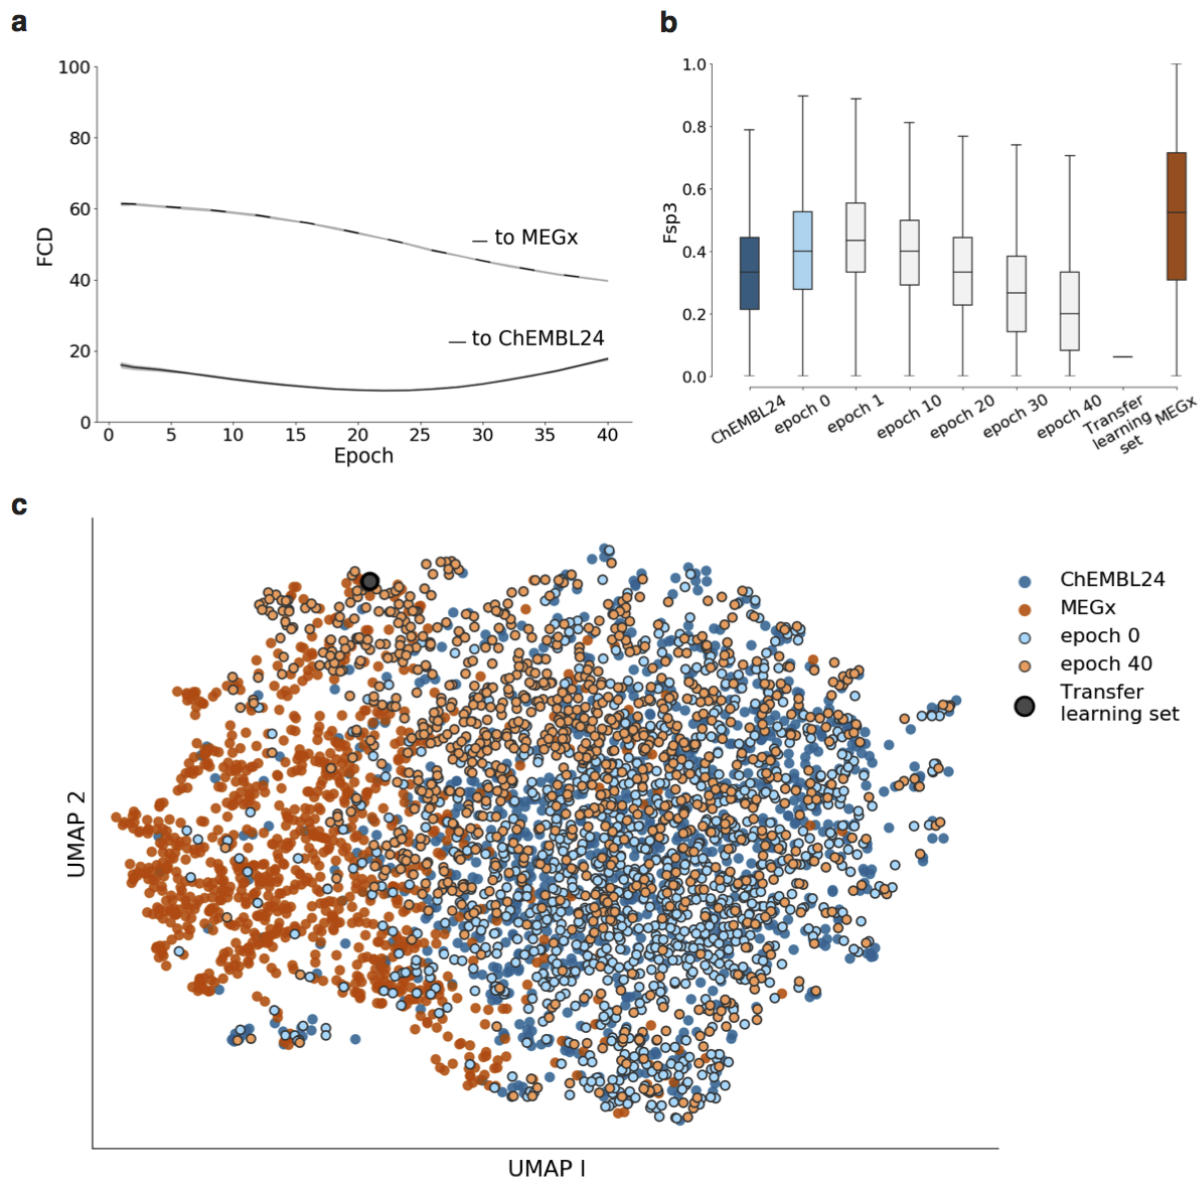

**Supplementary Figure 1. Chemical space navigation by transfer learning with one molecule.** **a**, Fréchet ChemNet Distance (FCD) to ChEMBL24 and MEGx of generated molecules during chemical space navigation. Mean and 0.95 confidence interval for ten repeats are shown in shaded area. **b**, Evolution of the fraction of  $sp^3$ -hybridized carbon atoms ( $F_{sp3}$ ) during the chemical space navigation. **c**, UMAP plot of molecules. For each group, 1k molecules were randomly selected. Dark blue: ChEMBL24. Dark orange: MEGx. Light blue: molecules generated from the pretrained model (*i.e.*, epoch zero). Light orange: molecules generated at epoch 40. Gray circles: transfer learning set.

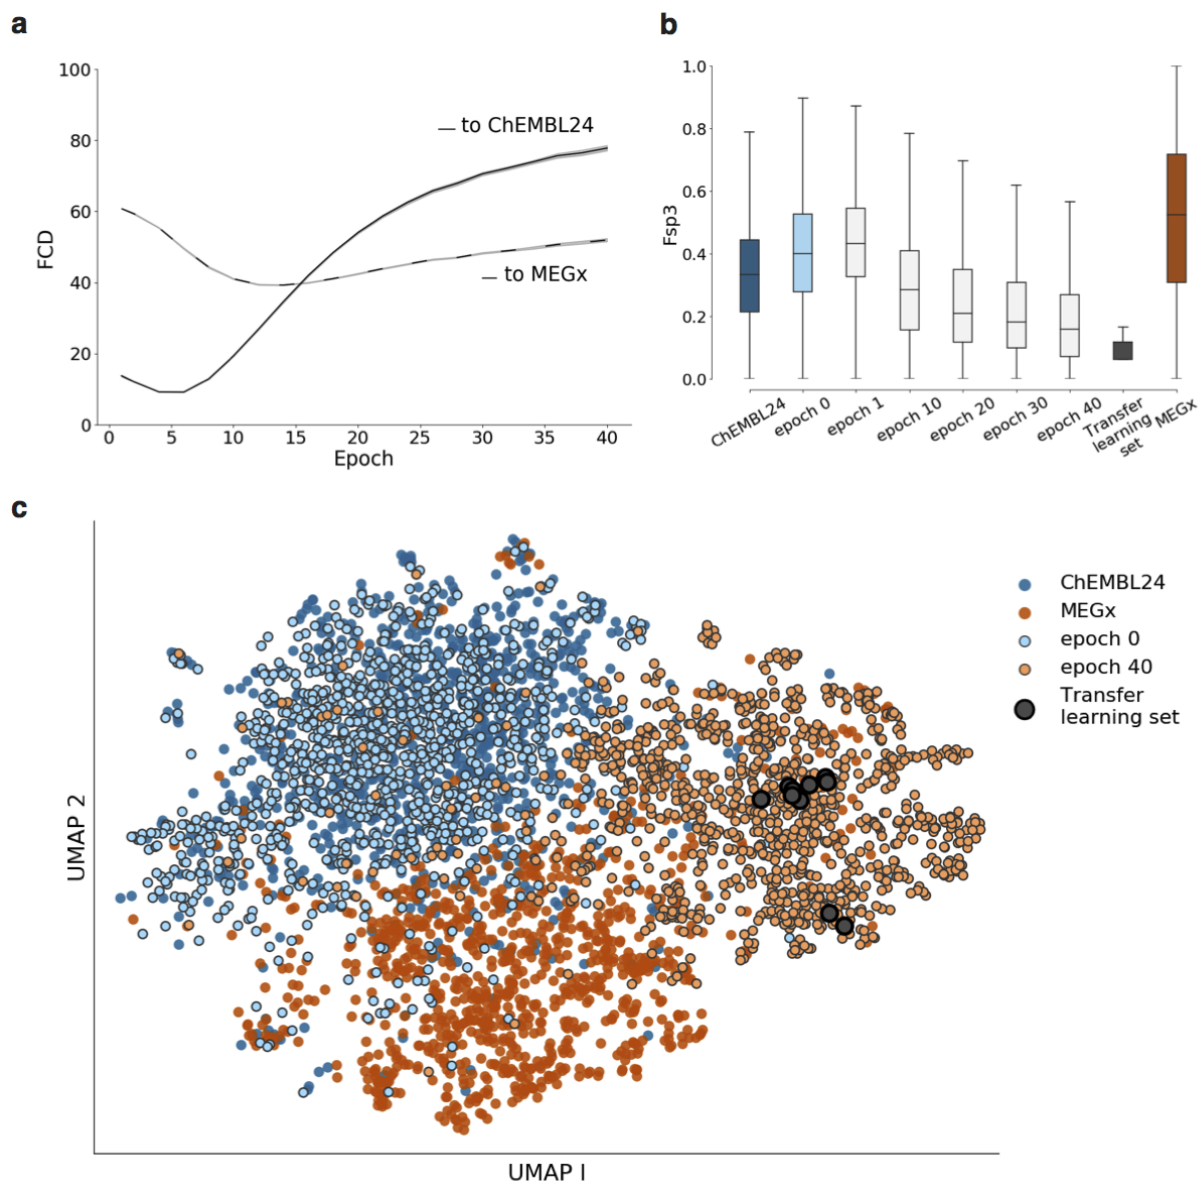

**Supplementary Figure 2. Chemical space navigation by transfer learning with 10 similar molecules.** **a**, Fréchet ChemNet Distance (FCD) to ChEMBL24 and MEGx of generated molecules during chemical space navigation. Mean and 0.95 confidence interval for ten repeats are shown in shaded area. **b**, Evolution of the fraction of sp<sup>3</sup>-hybridized carbon atoms (Fsp3) during the chemical space navigation. **c**, UMAP plot of molecules. For each group, 1k molecules were randomly selected. Dark blue: ChEMBL24. Dark orange: MEGx. Light blue: molecules generated from the pretrained model (*i.e.*, epoch zero). Light orange: molecules generated at epoch 40. Gray circles: transfer learning set.

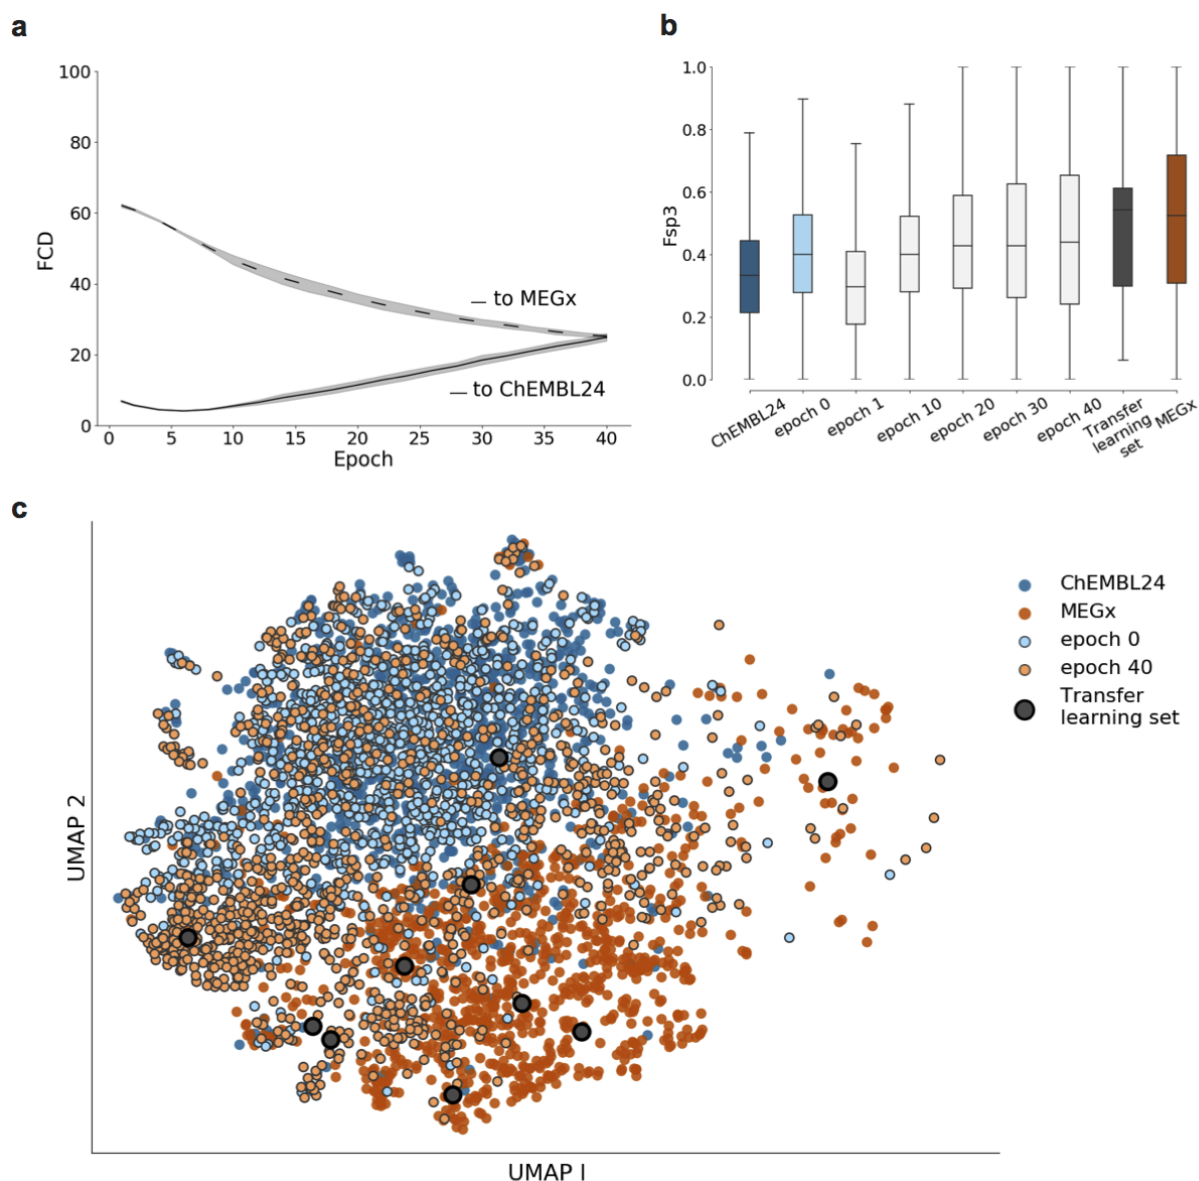

**Supplementary Figure 3. Chemical space navigation by transfer learning with 10 dissimilar molecules.** **a**, Fréchet ChemNet Distance (FCD) to ChEMBL24 and MEGx of generated molecules during chemical space navigation. Mean and 0.95 confidence interval for ten repeats are shown in shaded area. **b**, Evolution of the fraction of sp<sup>3</sup>-hybridized carbon atoms (Fsp3) during the chemical space navigation. **c**, UMAP plot of molecules. For each group, 1k molecules were randomly selected. Dark blue: ChEMBL24. Dark orange: MEGx. Light blue: molecules generated from the pretrained model (*i.e.*, epoch zero). Light orange: molecules generated at epoch 40. Gray circles: transfer learning set.

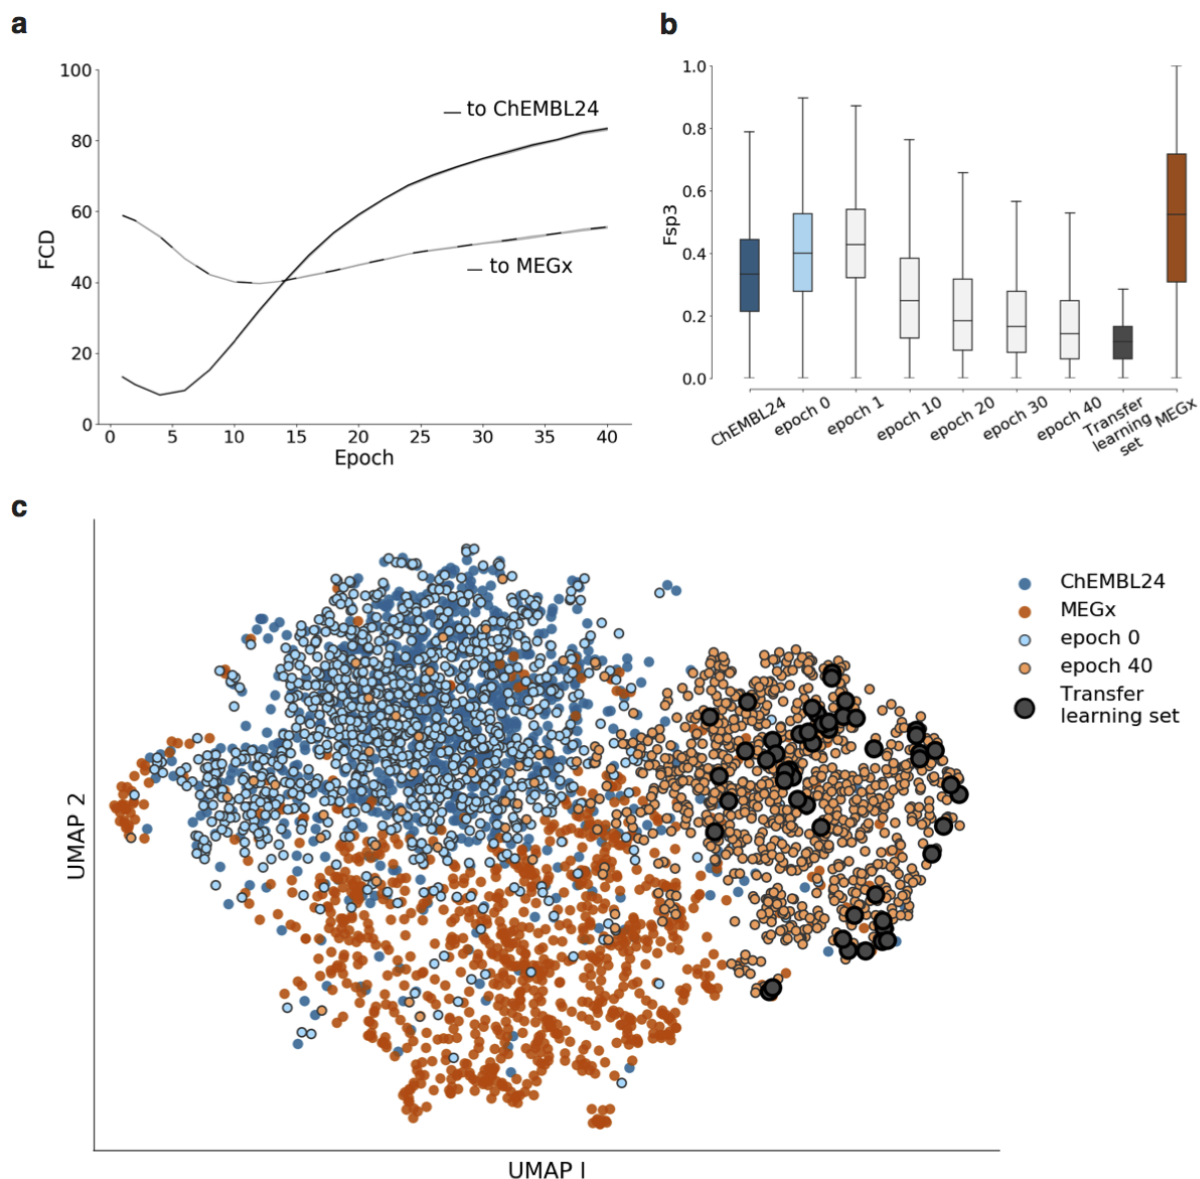

**Supplementary Figure 4. Chemical space navigation by transfer learning with 50 similar molecules.** **a**, Fréchet ChemNet Distance (FCD) to ChEMBL24 and MEGx of generated molecules during chemical space navigation. Mean and 0.95 confidence interval for ten repeats are shown in shaded area. **b**, Evolution of the fraction of sp<sup>3</sup>-hybridized carbon atoms (Fsp3) during the chemical space navigation. **c**, UMAP plot of molecules. For each group, 1k molecules were randomly selected. Dark blue: ChEMBL24. Dark orange: MEGx. Light blue: molecules generated from the pretrained model (*i.e.*, epoch zero). Light orange: molecules generated at epoch 40. Gray circles: transfer learning set.



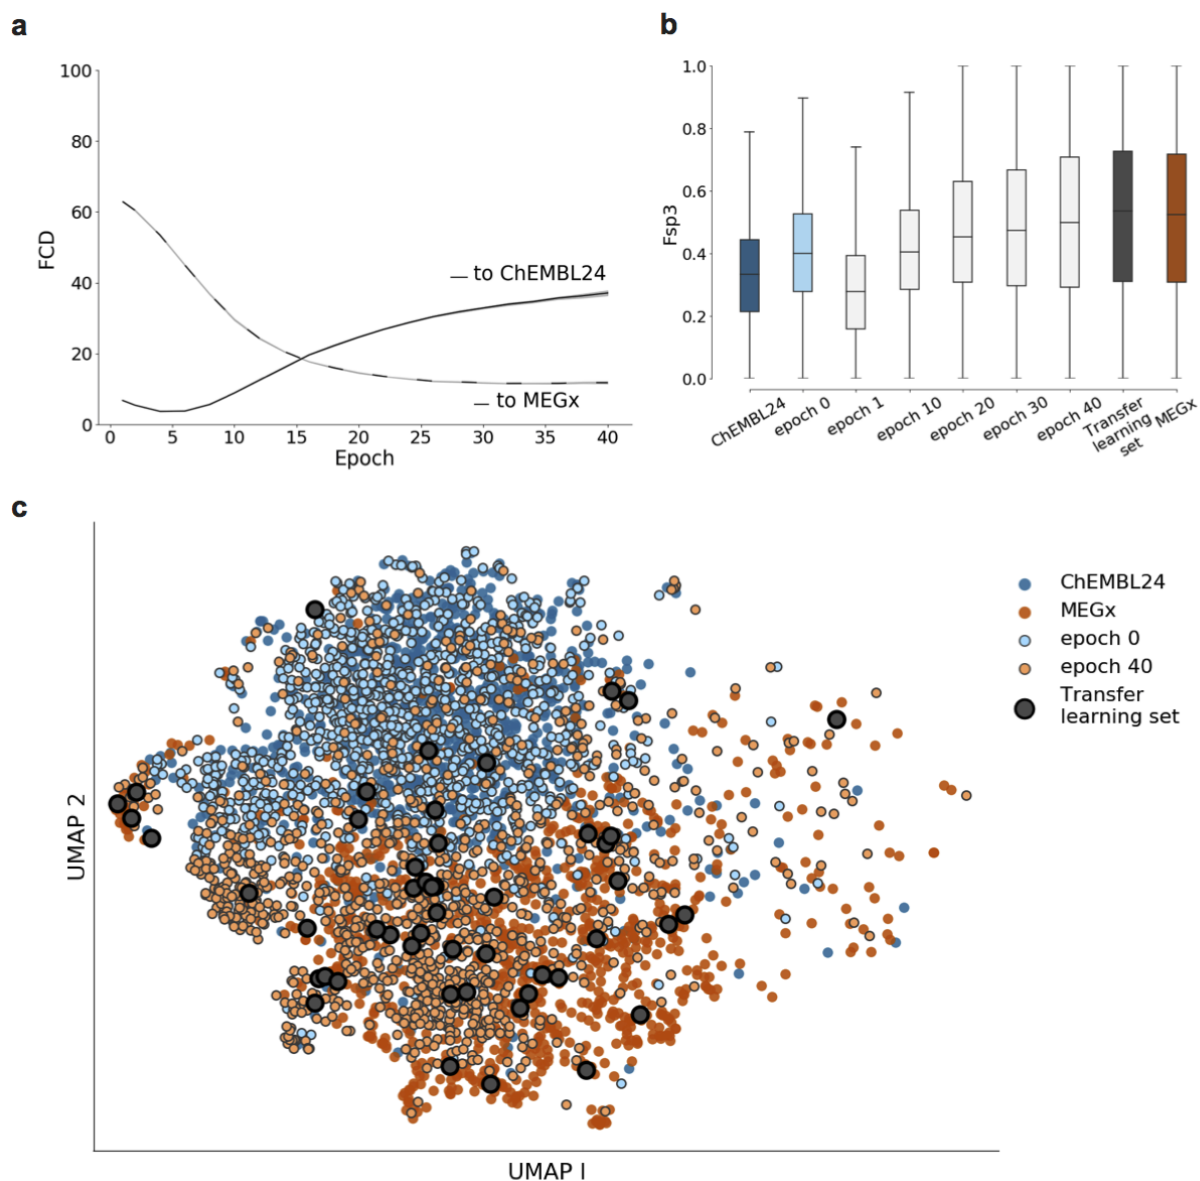

**Supplementary Figure 5. Chemical space navigation by transfer learning with 50 dissimilar molecules.** **a**, Fréchet ChemNet Distance (FCD) to ChEMBL24 and MEGx of generated molecules during chemical space navigation. Mean and 0.95 confidence interval for ten repeats are shown in shaded area. **b**, Evolution of the fraction of  $sp^3$ -hybridized carbon atoms (Fsp3) during the chemical space navigation. **c**, UMAP plot of molecules. For each group, 1k molecules were randomly selected. Dark blue: ChEMBL24. Dark orange: MEGx. Light blue: molecules generated from the pretrained model (*i.e.*, epoch zero). Light orange: molecules generated at epoch 40. Gray circles: transfer learning set.

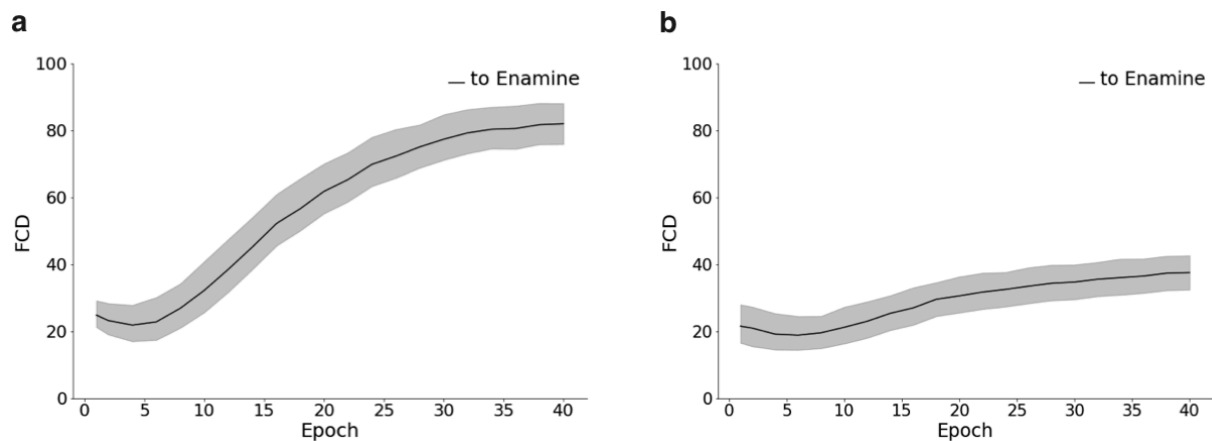

**Supplementary Figure 6.** Fréchet ChemNet Distance (FCD) of generated molecules to the Enamine compound collection. **a**, FCD of five similar molecules; **b**, FCD of five dissimilar molecules. The mean values and corresponding 0.95 confidence intervals (shaded area) are shown ( $N = 5$ ; independent random subsets).
